# Supplementary material for: Adaptive Responses and Resilience of Small Livestock Producers to Climate Variability in the Cruz Verde-Sumapaz Páramo, Colombia
Source: MDPI journal article supplement (doi:10.3390/land13040499), 2024-04-11
Supplement: s1 [file s1]

Supplementary Material S1. Household Survey

**ENCUESTA PARA LA EVALUACIÓN DE LA RESILIENCIA DE SISTEMAS DE PRODUCCIÓN GANADERA FRENTE A LA VARIABILIDAD CLIMÁTICA EN EL PÁRAMO DE SUMAPAZ**

El objetivo de esta encuesta es identificar los recursos económicos, sociales, culturales, humanos, naturales y de infraestructura que tienen los productores ganaderos para enfrentar la variabilidad climática. La información recolectada será utilizada con fines exclusivamente académicos.

|                      |  |
|----------------------|--|
| FECHA (DÍA/MES/AÑO)  |  |
| LUGAR DE REALIZACIÓN |  |

**IDENTIFICACIÓN DEL ENCUESTADO**

|                                                                                    |  |
|------------------------------------------------------------------------------------|--|
| NOMBRE DEL ENCUESTADO                                                              |  |
| EDAD                                                                               |  |
| SEXO                                                                               |  |
| ACTIVIDAD ECONÓMICA PRINCIPAL<br>(PRODUCCIÓN DE CARNE, LECHE O DOBLE<br>PROPÓSITO) |  |
| No. CABEZAS DE GANADO BOVINO                                                       |  |

**CAPITAL ECONÓMICO**

|                                                                                               |                                  |  |
|-----------------------------------------------------------------------------------------------|----------------------------------|--|
| 1. ¿De cuánta tierra dispone su familia para su actividad económica?                          | Entre 0 a 5 ha                   |  |
|                                                                                               | Entre 5 a 10 ha                  |  |
|                                                                                               | Entre 10 a 20 ha                 |  |
|                                                                                               | Más de 20                        |  |
| 2. ¿Cuáles son las fuentes de ingreso de su familia?<br>Selecciones todas las que desarrolle. | Actividad agrícola               |  |
|                                                                                               | Actividad pecuaria               |  |
|                                                                                               | Venta de mano de obra            |  |
|                                                                                               | Subsidios                        |  |
|                                                                                               | Otras actividades comerciales    |  |
|                                                                                               | Prestación de servicios técnicos |  |
| 3. ¿De cuánto dinero en efectivo dispone su familia al mes?                                   | Otros, ¿cuáles?                  |  |
|                                                                                               | Menos de 500.000                 |  |
|                                                                                               | Entre 500.000 y 1.000.000        |  |
|                                                                                               | Más de 1.000.000                 |  |

4. ¿En que utiliza su dinero cada mes? Asigne por favor el porcentaje en cada caso (la suma de todos debe ser del 100%).

|           |  |
|-----------|--|
| Alimentos |  |
| Educación |  |
| Vestido   |  |

|                 |  |
|-----------------|--|
| Vivienda        |  |
| Entretenimiento |  |
| Ahorros         |  |
| Otro            |  |

|                                   |    |  |    |  |
|-----------------------------------|----|--|----|--|
| 5. ¿Ahorra parte de sus ingresos? | SI |  | NO |  |
|-----------------------------------|----|--|----|--|

6. ¿Si su respuesta es positiva en que los utiliza? Asigne por favor el porcentaje en cada caso (la suma de todos debe ser del 100%)

|                                         |  |
|-----------------------------------------|--|
| Alimentos                               |  |
| Educación                               |  |
| Vestido                                 |  |
| Vivienda                                |  |
| Entretenimiento                         |  |
| Ahorros                                 |  |
| Tecnología                              |  |
| Insumos para la producción agropecuaria |  |

|                                                                                                                   |    |  |    |  |
|-------------------------------------------------------------------------------------------------------------------|----|--|----|--|
| 7. ¿Ha utilizado sus ingresos para atender algún evento del clima (heladas, sequías, lluvias torrenciales, etc.)? | SI |  | NO |  |
|-------------------------------------------------------------------------------------------------------------------|----|--|----|--|

8. ¿Cuál es el porcentaje del ingreso que utiliza para enfrentar las amenazas del clima?

| AMENAZA                | % INGRESOS UTILIZADOS |
|------------------------|-----------------------|
| Lluvias intensas       |                       |
| Sequías                |                       |
| Inundaciones           |                       |
| Heladas                |                       |
| Avalanchas             |                       |
| Desbordamiento de ríos |                       |

9. Sabemos también que en los últimos años se han dado cambios en los usos del suelo. ¿Podría decirme cuales son los cambios principales en la vereda y el porcentaje de área que ha aumentado en su uso? El porcentaje del área se calcula de 1 a 100.

| CAMBIOS EN LOS USOS                 | % DEL ÁREA |
|-------------------------------------|------------|
| Incremento de cultivos              |            |
| Incremento de actividades ganaderas |            |
| Incremento de pasturas              |            |
| Disminuciones de bosques            |            |
| Incremento del área de conservación |            |

10. Podría decirme ¿cuál es el nivel de influencia de las siguientes amenazas sobre la seguridad alimentaria de su familia? Por favor asigne la influencia del 1 al 3, siendo el 3 el de mayor influencia.

| AMENAZA                 | NIVEL DE INFLUENCIA SOBRE SEGURIDAD ALIMENTARIA |
|-------------------------|-------------------------------------------------|
| Sequías                 |                                                 |
| Deforestación de bosque |                                                 |
| Aumento de las lluvias  |                                                 |
| Heladas                 |                                                 |
| Aumento de temperatura  |                                                 |

|                                    |    |  |    |  |
|------------------------------------|----|--|----|--|
| 11. ¿Usted tiene acceso a crédito? | SI |  | NO |  |
|------------------------------------|----|--|----|--|

12. ¿Si su respuesta es positiva, cuénteme de dónde proviene el crédito y en que lo utiliza regularmente?

| FUENTE               | EN LO QUE LO UTILIZA |
|----------------------|----------------------|
| Bancos               |                      |
| Negocios comerciales |                      |
| Vecinos              |                      |
| Mercado informal     |                      |
| Familia              |                      |
| Otros                |                      |

### CAPITAL SOCIAL

|                                                                                                                                                          |                                       |  |    |  |
|----------------------------------------------------------------------------------------------------------------------------------------------------------|---------------------------------------|--|----|--|
| 13. ¿Su familia o usted pertenece a alguna asociación ganadera?                                                                                          | SI                                    |  | NO |  |
| 14. Si su respuesta es afirmativa, ¿cuál es su rol dentro de la asociación?                                                                              | Asociado                              |  |    |  |
|                                                                                                                                                          | Representante legal                   |  |    |  |
|                                                                                                                                                          | Tesorero                              |  |    |  |
|                                                                                                                                                          | Otro, ¿cuál?                          |  |    |  |
| 15. ¿Cuáles considera que son los principales beneficios de participar en esta asociación? Seleccionar todas las opciones que considere como beneficios. | Recibir asistencia técnica            |  |    |  |
|                                                                                                                                                          | Acceder a canales de comercialización |  |    |  |
|                                                                                                                                                          | Acceder tecnologías                   |  |    |  |
|                                                                                                                                                          | Acceder a capacitaciones              |  |    |  |
|                                                                                                                                                          | Acceder a créditos                    |  |    |  |
|                                                                                                                                                          | Acceder a subsidios                   |  |    |  |
|                                                                                                                                                          | Estabilidad en el precio de venta     |  |    |  |
|                                                                                                                                                          | Otros, ¿cuáles?                       |  |    |  |
| 16. ¿Participa en otras                                                                                                                                  | Juntas de acción comunal              |  |    |  |

|                                                                                                                                                   |                                            |  |    |  |
|---------------------------------------------------------------------------------------------------------------------------------------------------|--------------------------------------------|--|----|--|
| organizaciones?                                                                                                                                   | Asociación de productores agrícolas        |  |    |  |
|                                                                                                                                                   | Cooperativas                               |  |    |  |
|                                                                                                                                                   | Otra, ¿cuál?                               |  |    |  |
| 17. Si su respuesta anterior fue positiva ¿Con qué frecuencia participa de los espacios convocados por las organizaciones a las cuales pertenece? | Mensual                                    |  |    |  |
|                                                                                                                                                   | Trimestral                                 |  |    |  |
|                                                                                                                                                   | Anual                                      |  |    |  |
|                                                                                                                                                   | Eventualmente                              |  |    |  |
| 18. ¿Los miembros de su familia participan activamente de estas organizaciones?                                                                   | Siempre                                    |  |    |  |
|                                                                                                                                                   | Casi siempre                               |  |    |  |
|                                                                                                                                                   | Esporádicamente                            |  |    |  |
|                                                                                                                                                   | Nunca                                      |  |    |  |
| 19. ¿Su participación dentro de las organizaciones le ha permitido reducir los impactos de la variabilidad climática en su finca?                 | SI                                         |  | NO |  |
| 20. Si su anterior respuesta es afirmativa ¿Cuáles son los impactos del clima que ha podido disminuir?                                            | Disminución de fuentes hídricas            |  |    |  |
|                                                                                                                                                   | Erosión de los suelos                      |  |    |  |
|                                                                                                                                                   | Aumento de plagas y enfermedades           |  |    |  |
|                                                                                                                                                   | Muerte de animales                         |  |    |  |
|                                                                                                                                                   | Disminución de la producción carne y leche |  |    |  |
|                                                                                                                                                   | Otros, ¿cuáles?                            |  |    |  |
| 21. ¿Usted ha desarrollado estrategias para atender los impactos del clima?                                                                       | SI                                         |  | NO |  |
| Si su respuesta es positiva ¿cuáles son las estrategias? Seleccione todas las que se desarrolle:                                                  | Reforestación                              |  |    |  |
|                                                                                                                                                   | Protección de fuentes hídricas             |  |    |  |
|                                                                                                                                                   | Prácticas silvopastoriles                  |  |    |  |
|                                                                                                                                                   | Rotación de potreros                       |  |    |  |
|                                                                                                                                                   | Intensificación (ecología)                 |  |    |  |
|                                                                                                                                                   | Otra, ¿cuál?                               |  |    |  |
| ¿Cuál es la frecuencia con la que desarrolla estas actividades?                                                                                   | Permanente                                 |  |    |  |
|                                                                                                                                                   | Esporádica                                 |  |    |  |
|                                                                                                                                                   | Casi nunca                                 |  |    |  |
|                                                                                                                                                   | Nunca                                      |  |    |  |
| 22. ¿Participan las mujeres en las actividades relacionadas con el tema ganadero?                                                                 | SI                                         |  | NO |  |
| 23. ¿Participan los jóvenes en las actividades relacionadas con el tema ganadero?                                                                 | SI                                         |  | NO |  |

|                                                                                                       |                                                                                 |  |    |  |
|-------------------------------------------------------------------------------------------------------|---------------------------------------------------------------------------------|--|----|--|
| 24. ¿Conoce de proyectos de producción ganadera en la zona?                                           | SI                                                                              |  | NO |  |
| Si su respuesta es positiva, ¿cuál es el objetivo del proyecto?                                       | Asistencia técnica                                                              |  |    |  |
|                                                                                                       | Proyecto de conservación ambiental                                              |  |    |  |
|                                                                                                       | Proyectos de mejoramiento tecnológicos                                          |  |    |  |
|                                                                                                       | Proyectos para mejorar conocimiento técnico                                     |  |    |  |
|                                                                                                       | Proyectos de diversificación productiva                                         |  |    |  |
|                                                                                                       | Proyectos de mejoramiento productivo                                            |  |    |  |
|                                                                                                       | Otros, ¿cuáles?                                                                 |  |    |  |
| 25. ¿Existen personas o instituciones que impulsen las actividades de producción ganadera en la zona? | SI                                                                              |  | NO |  |
| Si su respuesta es afirmativa, ¿qué tipo de actores hacen presencia en la zona?                       | Alcaldía                                                                        |  |    |  |
|                                                                                                       | Intermediarios                                                                  |  |    |  |
|                                                                                                       | Universidades                                                                   |  |    |  |
|                                                                                                       | Compradores                                                                     |  |    |  |
|                                                                                                       | Productores                                                                     |  |    |  |
|                                                                                                       | Otros, ¿cuáles?                                                                 |  |    |  |
| 26. ¿Se presentan conflictos de cualquier tipo en el lugar donde vive actualmente?                    | SI                                                                              |  | NO |  |
| 27. ¿Si su respuesta es positiva, de qué tipo son?                                                    | Ambientales (ej. Deforestación, minería, deterioro, recurso hídrico, etc.)      |  |    |  |
|                                                                                                       | Territoriales (ej. Figuras de ordenamiento sobrepuestas)                        |  |    |  |
|                                                                                                       | Divergencia de valores culturales (ej. Visiones diferentes sobre el territorio) |  |    |  |
|                                                                                                       | Sociales (ej. Tensiones organizativas)                                          |  |    |  |
|                                                                                                       | Políticos (ej. Falta de acompañamiento institucional)                           |  |    |  |
|                                                                                                       | Personales                                                                      |  |    |  |
|                                                                                                       | Otros:                                                                          |  |    |  |
| 28. ¿Señale que actores permiten dar solución a esos conflictos?                                      | Familia                                                                         |  |    |  |
|                                                                                                       | Vecinos                                                                         |  |    |  |
|                                                                                                       | Actores externos                                                                |  |    |  |

|  |                        |  |
|--|------------------------|--|
|  | Alcaldía               |  |
|  | Gobernación            |  |
|  | Organismos ambientales |  |
|  | ONG's                  |  |
|  | Otros, ¿cuáles?        |  |

### CAPITAL CULTURAL

|                                                                                                                        |                                |  |    |  |
|------------------------------------------------------------------------------------------------------------------------|--------------------------------|--|----|--|
| 29. ¿Su familia y usted cuentan con saberes que permitan la conservación de los recursos naturales y la biodiversidad? | SI                             |  | NO |  |
| 30. ¿Las prácticas tradicionales del manejo de la producción ganadera han cambiado con el tiempo?                      | SI                             |  | NO |  |
| Si la respuesta es afirmativa, ¿cuáles son las razones de su transformación?                                           | Tecnificación de la producción |  |    |  |
|                                                                                                                        | Acceso a nuevo conocimiento    |  |    |  |
|                                                                                                                        | Acceso a educación             |  |    |  |
|                                                                                                                        | Cambios ambientales            |  |    |  |
|                                                                                                                        | Cambios del clima              |  |    |  |
|                                                                                                                        | Exigencias del mercado         |  |    |  |
|                                                                                                                        | Otra, ¿cuáles?                 |  |    |  |
| 31. ¿En su familia se ha transmitido conocimiento de la actividad ganadera a niños y jóvenes?                          | SI                             |  | NO |  |
| 32. ¿Los niños y jóvenes muestran interés de continuar con la actividad en el futuro?                                  | SI                             |  | NO |  |

33. ¿Podría decirme que tanta influencia tienen las siguientes amenazas sobre sus prácticas culturales? Asigne en cada aspecto un valor de influencia (1 poco / 2 medio/ 3 alto), y cuáles son las principales respuestas a esas amenazas?

| AMENAZA                   | INFLUENCIA | INFLUENCIA Y RESPUESTA |
|---------------------------|------------|------------------------|
| Sequías                   |            |                        |
| Deforestación de bosques  |            |                        |
| Aumento de las lluvias    |            |                        |
| Heladas                   |            |                        |
| Aumento de la temperatura |            |                        |

### CAPITAL FÍSICO

|                                                                                                     |         |  |    |  |
|-----------------------------------------------------------------------------------------------------|---------|--|----|--|
| 34. ¿Hay servicios básicos domiciliarios en su finca?                                               | SI      |  | NO |  |
| 35. Si su respuesta es positiva, ¿cuál es el estado de los servicios domiciliarios?                 | Buena   |  |    |  |
|                                                                                                     | Regular |  |    |  |
|                                                                                                     | Malo    |  |    |  |
| 36. ¿Cuál es el estado de las vías en su vereda?                                                    | Buena   |  |    |  |
|                                                                                                     | Regular |  |    |  |
|                                                                                                     | Malo    |  |    |  |
| 37. ¿Cuál es el estado de la vivienda de su familia?                                                | Buena   |  |    |  |
|                                                                                                     | Regular |  |    |  |
|                                                                                                     | Malo    |  |    |  |
| 38. ¿Cuenta en su finca con infraestructura productiva adecuada para el desarrollo de la actividad? | SI      |  | NO |  |

### CAPITAL HUMANO

39. ¿Incluya por favor la información correspondiente a los miembros que viven con usted? (Parentesco: madre, padre, hijo, abuelo, primo), Educación (primaria, secundaria, universitaria, técnica), Mano de obra (familiar o contratada).

| PARENTESCO | EDAD | SEXO | EDUCACIÓN | MANO DE OBRA |
|------------|------|------|-----------|--------------|
|            |      |      |           |              |
|            |      |      |           |              |
|            |      |      |           |              |
|            |      |      |           |              |
|            |      |      |           |              |

### CAPITAL NATURAL

|                                                               |         |  |
|---------------------------------------------------------------|---------|--|
| 40. ¿Cuál considera que es el estado del agua en su finca?    | Buena   |  |
|                                                               | Regular |  |
|                                                               | Malo    |  |
| 41. ¿Cuál considera que es el estado del suelo en su finca?   | Buena   |  |
|                                                               | Regular |  |
|                                                               | Malo    |  |
| 42. ¿Cuál considera que es el estado de los bosques en finca? | Buena   |  |
|                                                               | Regular |  |

|                                                                                                           |                                                   |  |    |  |
|-----------------------------------------------------------------------------------------------------------|---------------------------------------------------|--|----|--|
|                                                                                                           | Malo                                              |  |    |  |
| 43. ¿Considera que los recursos naturales en su finca se encuentran amenazados y deteriorados?            | SI                                                |  | NO |  |
| 44. Si su respuesta es afirmativa señale el conjunto de factores que pueden estar afectando los recursos: | Contaminación por vertimientos y residuos sólidos |  |    |  |
|                                                                                                           | Falta de educación                                |  |    |  |
|                                                                                                           | Deforestación                                     |  |    |  |
|                                                                                                           | Presiones de actores externos                     |  |    |  |
|                                                                                                           | Aumento de la población                           |  |    |  |
|                                                                                                           | Políticas de estado                               |  |    |  |
|                                                                                                           | Proyectos mineros                                 |  |    |  |
|                                                                                                           | Cambio climático                                  |  |    |  |
| Aumento de actividades agropecuarias                                                                      |                                                   |  |    |  |
| 45. ¿Desarrolla en su finca prácticas de conservación ambiental?                                          | SI                                                |  | NO |  |
| 46. ¿Si su respuesta es positiva señale las actividades que comúnmente se desarrollan?                    | Reforestación                                     |  |    |  |
|                                                                                                           | Educación ambiental                               |  |    |  |
|                                                                                                           | Mejoramiento de suelos                            |  |    |  |
|                                                                                                           | Protección de fuentes hídricas                    |  |    |  |
|                                                                                                           | Jornadas de limpieza                              |  |    |  |
|                                                                                                           | Otro                                              |  |    |  |
| 47. ¿Realiza prácticas en su finca de conservación del agua?                                              | SI                                                |  | NO |  |

48. ¿Si su respuesta es positiva señale las dos más importantes y con qué frecuencia?

| ¿CUÁLES? | FRECUENCIA (MENSUAL/ANUAL) |
|----------|----------------------------|
|          |                            |
|          |                            |

|                                                    |    |  |    |  |
|----------------------------------------------------|----|--|----|--|
| 49. ¿Realiza prácticas de conservación del bosque? | SI |  | NO |  |
|----------------------------------------------------|----|--|----|--|

50. ¿Si su respuesta es positiva señale las dos más importantes y con qué frecuencia?

| ¿CUÁLES? | FRECUENCIA (MENSUAL/ANUAL) |
|----------|----------------------------|
|          |                            |
|          |                            |



|                                                   |    |  |    |  |
|---------------------------------------------------|----|--|----|--|
| 51. ¿Realiza prácticas de conservación del suelo? | SI |  | NO |  |
|---------------------------------------------------|----|--|----|--|

52. ¿Si su respuesta es positiva señale las dos más importantes y con qué frecuencia?

| ¿CUÁLES? | FRECUENCIA (MENSUAL/ANUAL) |
|----------|----------------------------|
|          |                            |
|          |                            |
